# Supplementary material
Source: PubMed Central journal article supplement (PMC5731084)
Supplement: blood775569-suppl1.pdf [file blood775569-suppl1.pdf]

## **Supplementary Data**

Supplementary Figure 1: Frameshift deletions in *SETD2* and *MSH6* in MOLM-13 subclones

Supplementary Figure 2: Chromatin Immunoprecipitation-Sequencing with *Drosophila* chromatin spike in normalization

Supplementary Figure 3: *In vitro* cytarabine resistance for murine MLL-AF9 cells

Supplementary Figure 4: *SETD2* loss and impairment of MSH6 localization

Supplementary Figure 5: Additional studies of MLL-AF9 Setd2 mutant leukemia

Supplementary Table 1: *SETD2* mutations reported in Pediatric Acute Lymphoblastic Leukemia and Hematological Malignancies in the Catalog of Somatic Mutations in Cancer (COSMIC)

Supplementary Table 2: Small guide sequences and primers used

Supplementary Table 3: Novel clonal mutations identified in 6-thioguanine treated MOLM-13 subclones

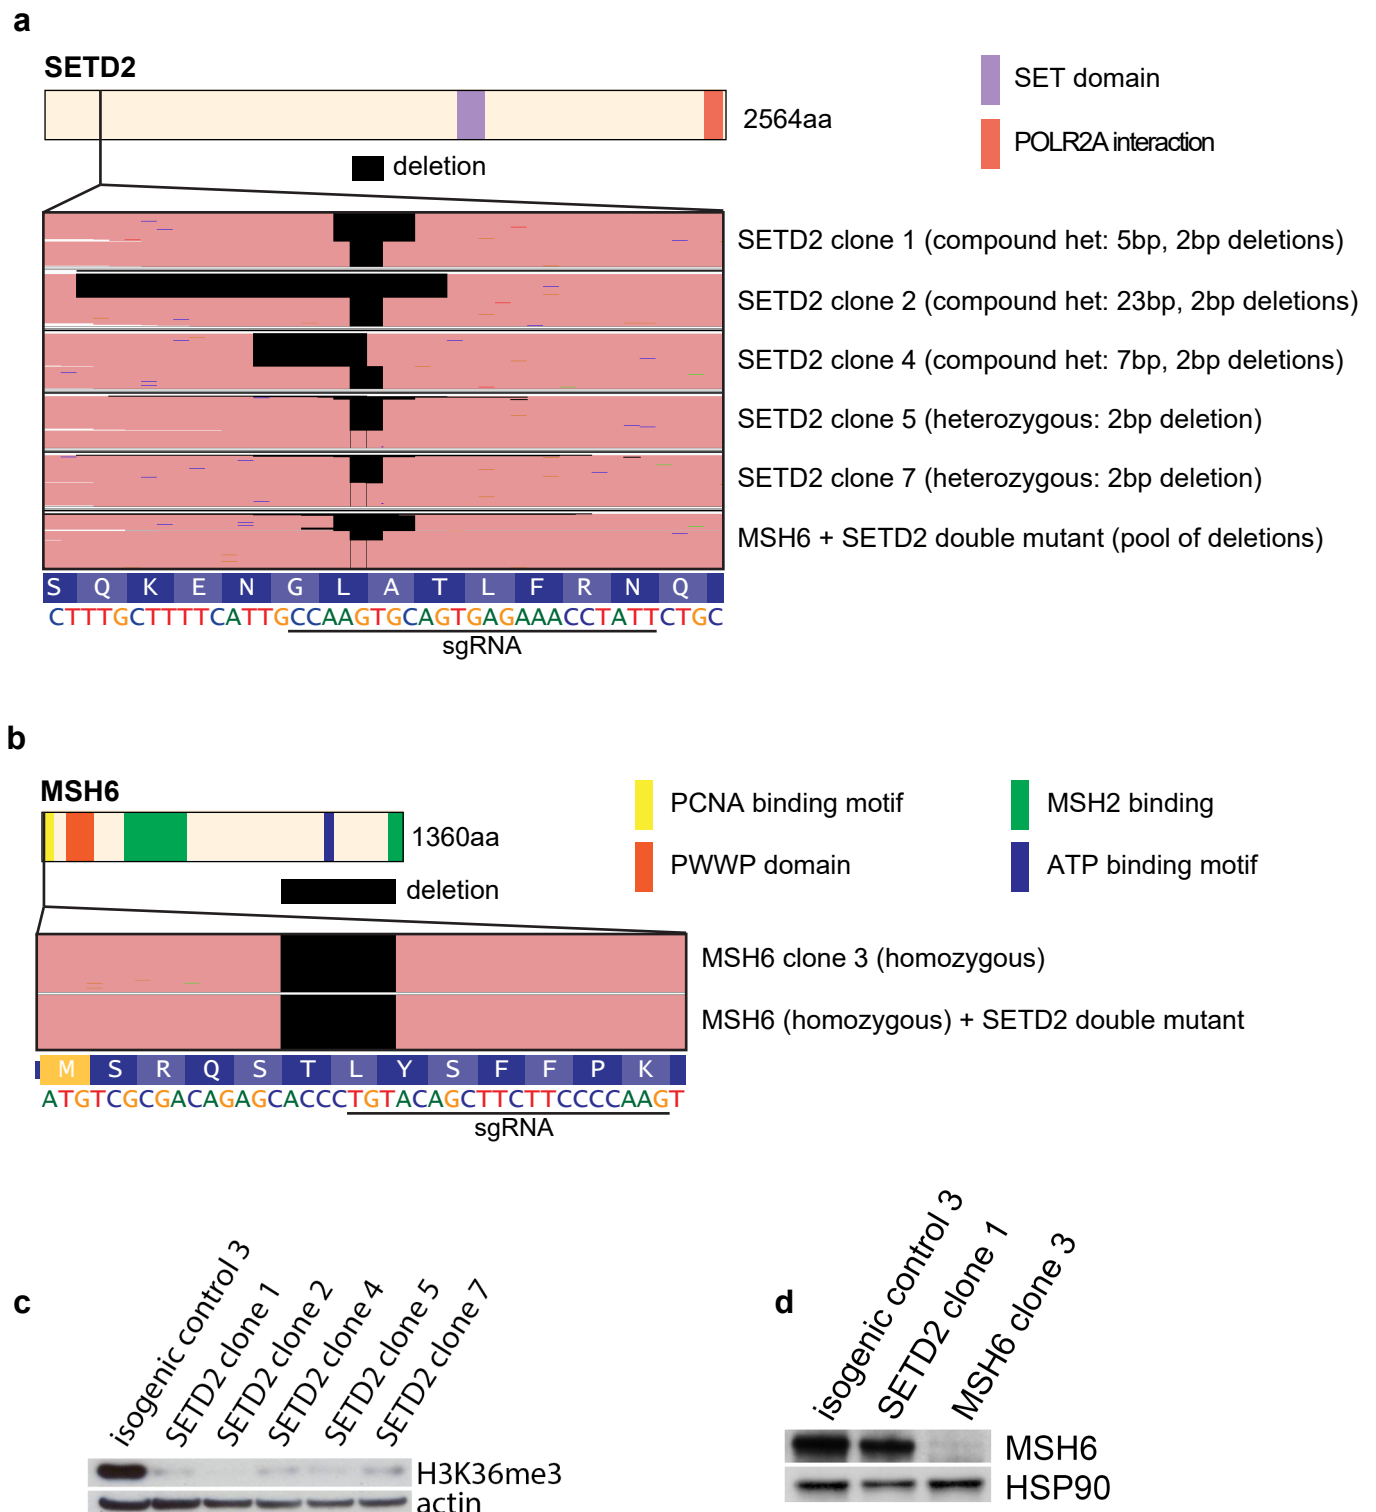

**Supplementary Figure 1. Frameshift deletions in *SETD2* and *MSH6* in MOLM-13 sub-clones. a)** Genomic DNA was PCR amplified and next generation sequencing was used to quantitatively determine the presence of deletions in each clone. Each schematic shows the location of the sgRNA in relationship to the *SETD2* or **b)** *MSH6* protein and its known domains, and shows the relevant aligned reads with deletions in black. Colors other than pink represent mismatches in the alignment, some of which may represent reads with large insertions or deletions that misaligned to the genome. **c)** Western blot for H3K36me3 of MOLM-13 subclones with *SETD2* deletions and isogenic control 3. **d)** Western blot for MSH6 of MOLM-13 subclones with *MSH6* deletions and isogenic controls.

**a**

| Sample                     | Histone Mark | Dm ReadCountTotal | Hg ReadCountTotal | Spikeln_Norm | Depth_Norm* |
|----------------------------|--------------|-------------------|-------------------|--------------|-------------|
| MOLM-13 isogenic control 3 | H3K36me3     | 656,423.00        | 40,158,309.00     | 1.523        | 0.249       |
| MOLM-13 SETD2 clone 1      | H3K36me3     | 786,053.00        | 37,474,822.00     | 1.272        | 0.267       |

\*Normalized to 10 million reads

**b**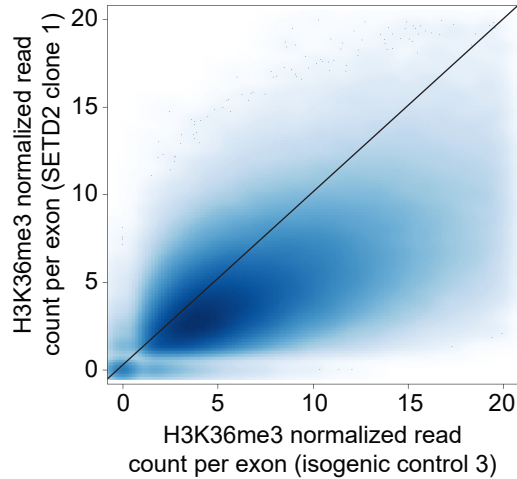**c**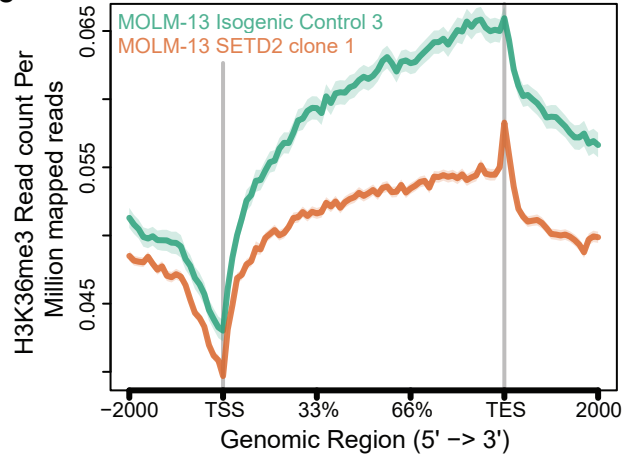**d**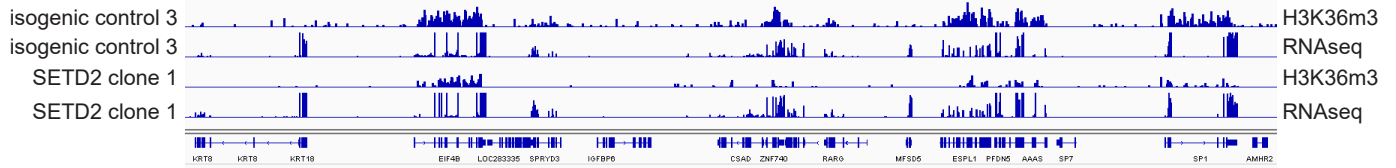

**Supplementary Figure 2. Chromatin Immunoprecipitation-Sequencing with *Drosophila* chromatin spike in normalization.** **a)** Sequencing metrics with normalization factors used. **b)** H3K36me3 chromatin immunoprecipitation sequencing reads, normalized to *Drosophila* chromatin spike-in, for expressed and non-expressed genes, normalized for gene body length, in MOLM-13 subclones with a *SETD2* sgRNA (*SETD2* clone 1) or isogenic control 3. Gene expression was determined by RNA sequencing. TSS = Transcriptional Start Site, TES = Transcriptional End Site. **c)** H3K36me3 levels over all genes, normalized over gene body length between the vertical lines. TSS: Transcriptional Start Site. TES: Transcriptional End Site. **d)** Representative view of normalized H3K36me3 and expression at the gene level in the Integrated Genome Viewer.

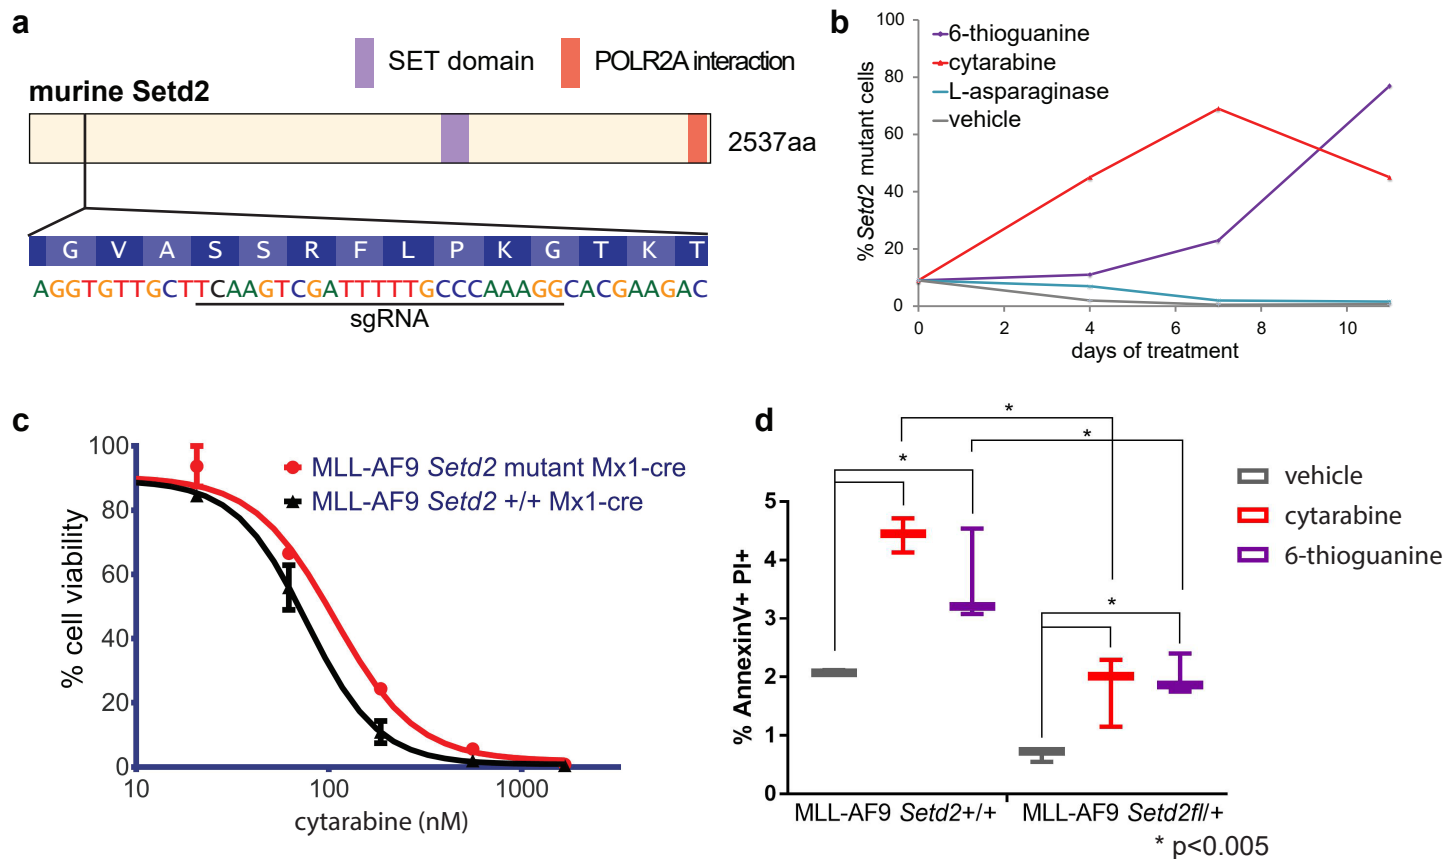

**Supplementary Figure 3. In vitro cytarabine resistance of murine *MLL-AF9 Setd2* mutated cells.** **a)** CRISPR/Cas9 was used to induce frameshift mutations in the exon 3 of *Setd2* in murine *MLL-AF9* cells. Schematic shows the location and sequence of the sgRNA targeting *Setd2*. **b)** Murine *MLL-AF9* cells was transduced with a lentivirus Cas9-puro and selected with puro, then transduced with a lentivirus expressing a sgRNA to *Setd2* and RFP657. This was mixed with *MLL-AF9* Cas9-puro cells in a 1:10 ratio and then treated with cytarabine, 6-thioguanine, L-asparaginase or vehicle. In this pooled experiment, in the absence of selective pressure of 6-thioguanine or cytarabine, sgRNA editing of *Setd2* likely goes to completion, which may explain de-enrichment in the vehicle and L-asparaginase arms. **c)** Conditional knockout *MLL-AF9 Setd2* mutant and *Setd2*+/+ cells were assessed for *in vitro* chemotherapy resistance. Cell titer Glo was used to determine % cell viability after 72 hours of cytarabine. **d)** *MLL-AF9 Setd2* mutant and *Setd2*+/+ cells were treated with cytarabine 50nM, or 6-thioguanine 50nM and assessed for apoptosis by flow cytometry after staining for AnnexinV and propidium iodide 24 hours later.

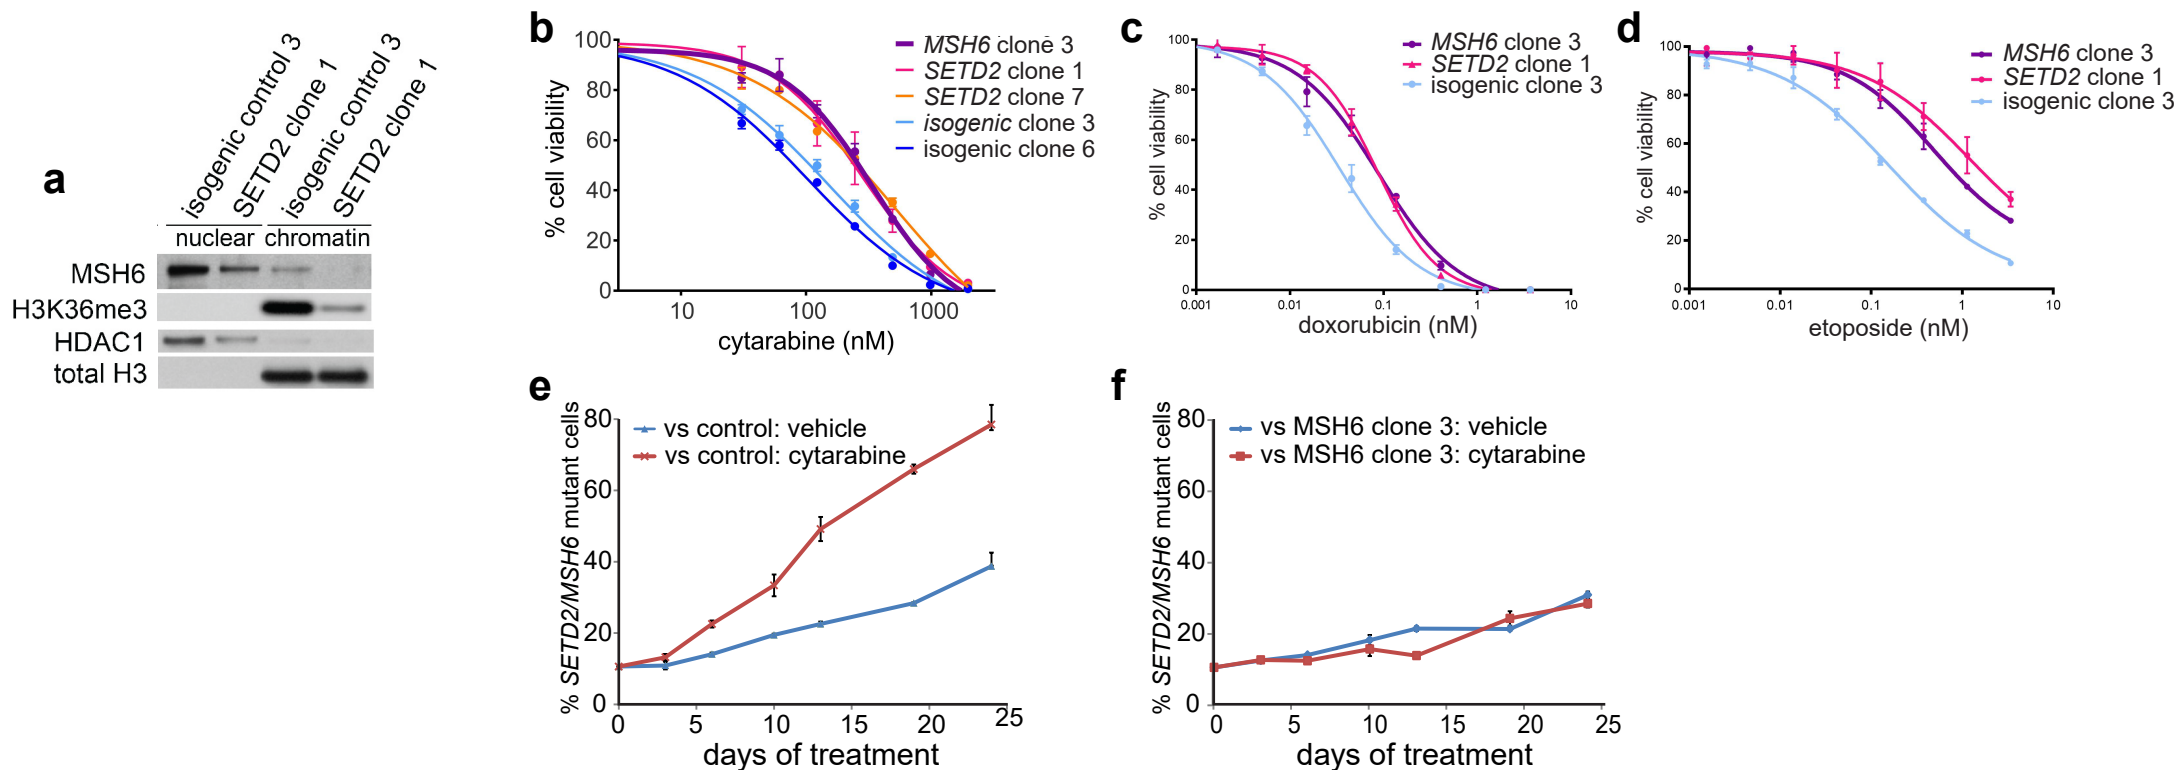

**Supplementary Figure 4. SETD2 loss, impairment of MSH6 localization and MSH6 loss induced chemotherapy resistance.**

**a)** MOLM-13 SETD2 clone 1 and MOLM-13 isogenic control 3 cells were fractionated into nuclear or chromatin compartments and Western blotted. HDAC1 and total H3 are the loading controls for the nuclear and chromatin fractions, respectively. **b)** Cell titer Glo was used to determine % cell viability after 72 hours of araC, **c)** doxorubicin or **d)** etoposide treatment for MOLM-13 MSH6 clone 3, SETD2 clones and isogenic controls. MOLM-13 MSH6 clone 3 was transduced with a Cas9-SETD2 sgRNA and then an RFP+ lentivirus. This was mixed with **e)** isogenic control 3 or **f)** MSH6 clone 3 in a 1:10 ratio and treated with araC or vehicle for 25 days and followed by flow cytometry for tdTomato.

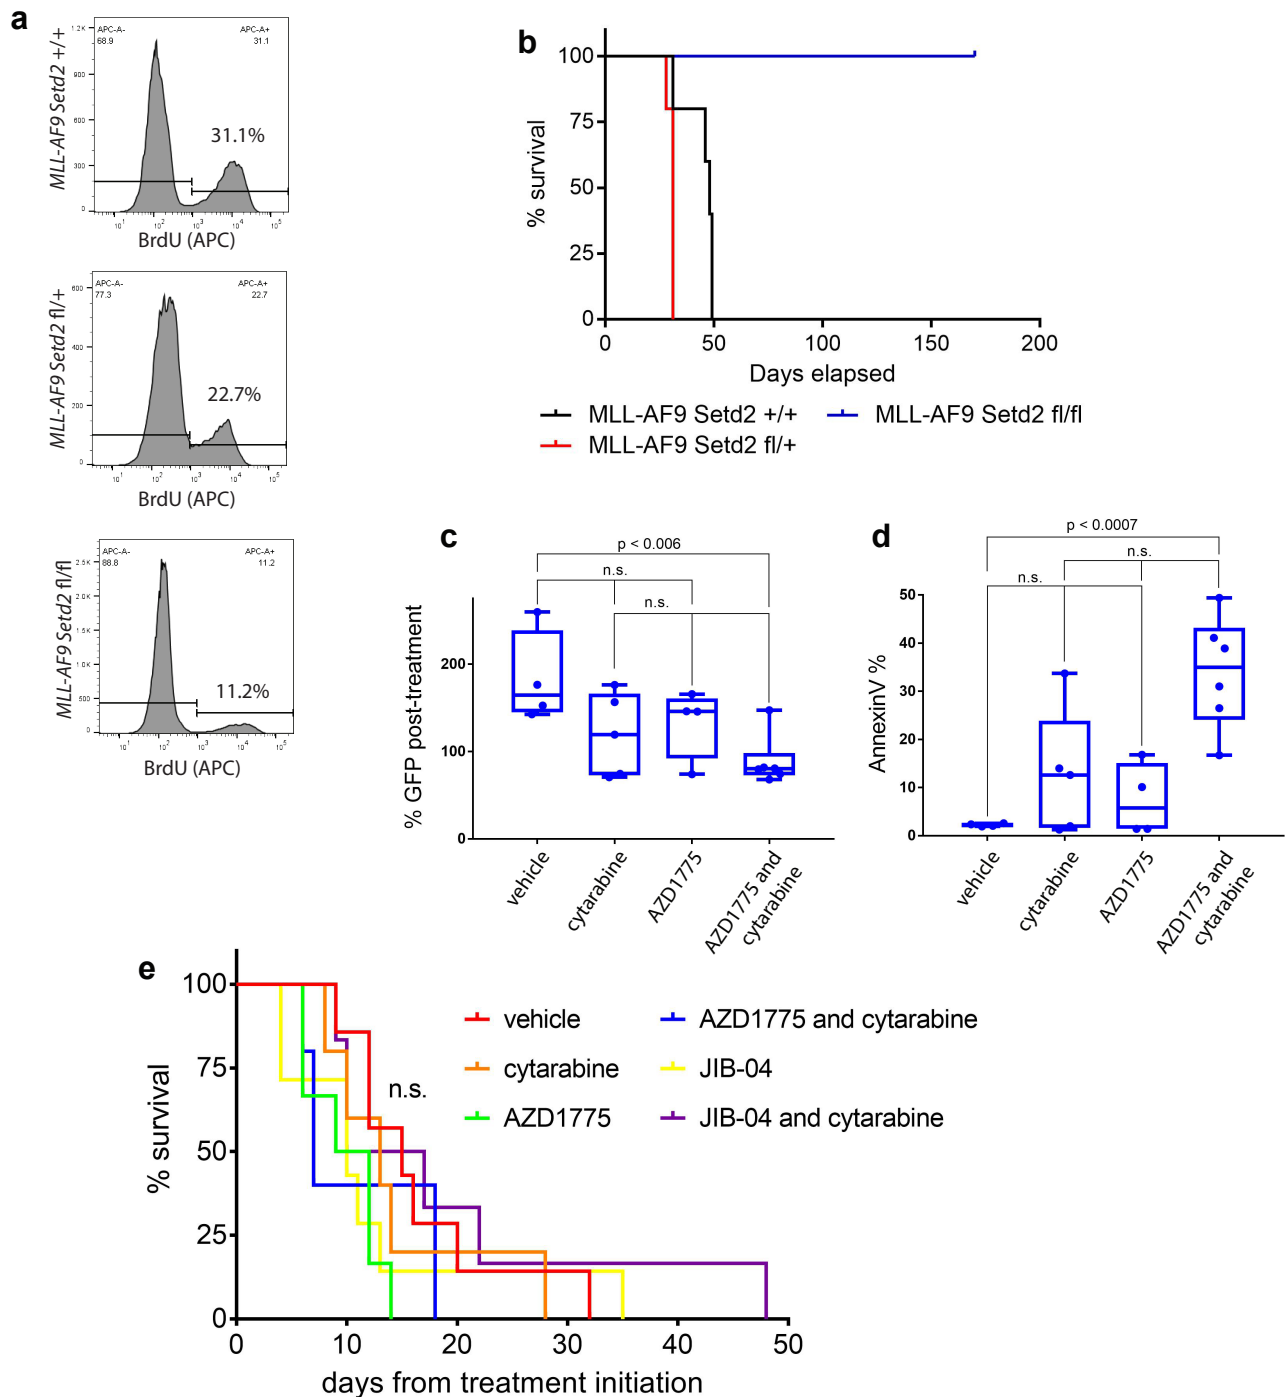

### Supplementary Figure 5. Additional studies of *MLL-AF9 Setd2* mutant leukemia

**a)** BrdU cell cycle analysis of primary *MLL-AF9* leukemia cells grown *in vitro*. **b)** 50,000 bone marrow cells from mice (n=5 in each arm) with primary *MLL-AF9 Setd2 +/+*, *Setd2 fl/+* or *Setd2 fl/fl* Mx1-cre leukemia were injected into secondary C57BL/6 recipients and monitored for the development of leukemia and sacrificed when moribund. **c)** Mice with secondary *MLL-AF9 Setd2 fl/+* Mx1-cre leukemia received a single dose of vehicle (n=4), araC (n=5), AZD1775 (n=4) and araC with AZD1775 (n=6) when their peripheral blood GFP was approximately 40% and were re-bled 12-16 hours later to determine the reduction in cell number, expressed as a percent of pre-treatment GFP, or **d)** stained with AnnexinV to determine the amount of apoptosis following treatment. **e)** Mice with secondary *MLL-AF9 Setd2 fl/+* Mx1-cre leukemia initiated treatment with 5 days of or vehicle (n=7), cytarabine (n=5), AZD1775 (n=6), AZD1775 and cytarabine (n=5), JIB-04 (n=7), JIB-04 and cytarabine (n=6) when peripheral blood GFP was around 5%.

Supplementary Table 1: SETD2 mutations reported in Pediatric Acute Lymphoblastic Leukemia and Hematological Malignancies in the Catalog of Somatic Mutations in Cancer (COSMIC)

DFCI Pediatric B-ALL cohort

| Sample   | specimen  | Genome pos.   | Gene  | Isoform   | Mutation           | Ref | Alt | LOH | Pubmed ID | diagnosis_full                      | diagnosis_subtype | Class      |
|----------|-----------|---------------|-------|-----------|--------------------|-----|-----|-----|-----------|-------------------------------------|-------------------|------------|
| TCALL015 | DIAGNOSIS | chr3:47129621 | SETD2 | NM_014159 | p.T1753fs          | AC  | -   | Yes | 24662245  | B-cell Acute Lymphoblastic Leukemia |                   | FRAMESHIFT |
| TCALL027 | DIAGNOSIS | chr3:47164571 | SETD2 | NM_014159 | p.K519_R520delinsX | A   | -   | No  | 24662245  | B-cell Acute Lymphoblastic Leukemia | hyperdiploidy     | NONSENSE   |
| TCALL056 | DIAGNOSIS | chr3:47058642 | SETD2 | NM_014159 | p.K2546X           | A   | T   | Yes | 24662245  | B-cell Acute Lymphoblastic Leukemia |                   | NONSENSE   |
| TCALL027 | RELAPSE   | chr3:47164571 | SETD2 | NM_014159 | p.K519_R520delinsX | A   | -   | No  | 24662245  | B-cell Acute Lymphoblastic Leukemia | hyperdiploidy     | NONSENSE   |
| TCALL037 | RELAPSE   | chr3:47144908 | SETD2 | NM_014159 | p.I1615fs          | A   | -   | No  | 24662245  | B-cell Acute Lymphoblastic Leukemia | iAMP21            | FRAMESHIFT |
| TCALL056 | RELAPSE   | chr3:47058642 | SETD2 | NM_014159 | p.K2546X           | A   | T   | Yes | 24662245  | B-cell Acute Lymphoblastic Leukemia |                   | NONSENSE   |
| ASALL011 | DIAGNOSIS | chr3:47162032 | SETD2 | NM_014159 | p.G1365E           | C   | T   | No  | 24662245  | B-cell Acute Lymphoblastic Leukemia | hyperdiploidy     | MISSENSE   |
| ASALL028 | DIAGNOSIS | chr3:47125808 | SETD2 | NM_014159 | p.L1821P           | A   | G   | No  | 24662245  | B-cell Acute Lymphoblastic Leukemia |                   | MISSENSE   |
| ASALL033 | DIAGNOSIS | chr3:47125526 | SETD2 | NM_014159 | p.V1915A           | A   | G   | No  | 24662245  | B-cell Acute Lymphoblastic Leukemia | hyperdiploidy     | MISSENSE   |
| ASALL039 | DIAGNOSIS | chr3:47165327 | SETD2 | NM_014159 | p.V267I            | C   | T   | No  | 24662245  | B-cell Acute Lymphoblastic Leukemia | ETV6/RUNX1        | MISSENSE   |
| ASALL043 | DIAGNOSIS | chr3:47161880 | SETD2 | NM_014159 | p.E1416X           | C   | A   | No  | 24662245  | B-cell Acute Lymphoblastic Leukemia | MLL rearrangement | NONSENSE   |
| ASALL044 | DIAGNOSIS | chr3:47163744 | SETD2 | NM_014159 | p.Y794X            | G   | C   | No  | 24662245  | B-cell Acute Lymphoblastic Leukemia |                   | NONSENSE   |
| ASALL048 | DIAGNOSIS | chr3:47142975 | SETD2 | NM_014159 | p.T1663M           | G   | A   | No  | 24662245  | B-cell Acute Lymphoblastic Leukemia |                   | MISSENSE   |
| ASALL050 | DIAGNOSIS | chr3:47162615 | SETD2 | NM_014159 | p.T1171A           | T   | C   | No  | 24662245  | B-cell Acute Lymphoblastic Leukemia | hyperdiploidy     | MISSENSE   |
| ASALL077 | DIAGNOSIS | chr3:47161769 | SETD2 | NM_014159 | p.D1453N           | C   | T   | No  | 24662245  | B-cell Acute Lymphoblastic Leukemia |                   | MISSENSE   |
| ASALL078 | DIAGNOSIS | chr3:47205410 | SETD2 | NM_014159 | p.K2R              | T   | C   | No  | 24662245  | B-cell Acute Lymphoblastic Leukemia | BCR-ABL           | MISSENSE   |
| ASALL079 | DIAGNOSIS | chr3:47162777 | SETD2 | NM_014159 | p.F1117fs          | A   | -   | No  | 24662245  | B-cell Acute Lymphoblastic Leukemia | ETV6/RUNX1        | FRAMESHIFT |
| ASALL080 | DIAGNOSIS | chr3:47164718 | SETD2 | NM_014159 | p.S470P            | A   | G   | No  | 24662245  | B-cell Acute Lymphoblastic Leukemia |                   | MISSENSE   |
| ASALL108 | DIAGNOSIS | chr3:47205359 | SETD2 | NM_014159 | p.E19G             | T   | C   | No  | 24662245  | B-cell Acute Lymphoblastic Leukemia | MLL rearrangement | MISSENSE   |
| ASALL111 | DIAGNOSIS | chr3:47164571 | SETD2 | NM_014159 | p.K519R520delinsX  | -   | T   | No  | 24662245  | B-cell Acute Lymphoblastic Leukemia | hyperdiploidy     | NONSENSE   |
| ASALL115 | DIAGNOSIS | chr3:47205410 | SETD2 | NM_014159 | p.K2R              | T   | C   | No  | 24662245  | B-cell Acute Lymphoblastic Leukemia |                   | MISSENSE   |
| ASALL119 | DIAGNOSIS | chr3:47162900 | SETD2 | NM_014159 | p.S1076P           | A   | G   | No  | 24662245  | B-cell Acute Lymphoblastic Leukemia | ETV6/RUNX1        | MISSENSE   |

SIICRH Pediatric ALL Cohort

| Sample          | specimen  | Genome pos.   | Gene  | Isoform   | Mutation               | Ref                           | Alt   | LOH           | Pubmed ID | diagnosis                           | diagnosis_subtype | Class        |
|-----------------|-----------|---------------|-------|-----------|------------------------|-------------------------------|-------|---------------|-----------|-------------------------------------|-------------------|--------------|
| SIERG005_D      | DIAGNOSIS | chr3:47129620 | SETD2 | NM_014159 | C1754R                 | A                             | G     | No            | 27776115  | B-cell Acute Lymphoblastic Leukemia | DUX4/ERG          | MISSENSE     |
| SITALL199_D     | DIAGNOSIS | chr3:47164805 | SETD2 | NM_014159 | R441*                  | G                             | A     | Not available | 22237106  | T-cell Acute Lymphoblastic Leukemia | ETP               | NONSENSE     |
| SITALL173_D     | DIAGNOSIS | chr3:47155452 | SETD2 | NM_014159 | P1534_R1543fs          | CCGCTCTATTGGAAACAATAATCCCATTT | -     | Not available | 22237106  | T-cell Acute Lymphoblastic Leukemia | ETP               | FRAMESHIFT   |
| SITALL202_D     | DIAGNOSIS | chr3:47125363 | SETD2 | NM_014159 | K1969fs                | -                             | CT    | Not available | 22237106  | T-cell Acute Lymphoblastic Leukemia | ETP               | FRAMESHIFT   |
| SITALL202_D     | DIAGNOSIS | chr3:47164508 | SETD2 | NM_014159 | R540*                  | G                             | A     | Not available | 22237106  | T-cell Acute Lymphoblastic Leukemia | ETP               | NONSENSE     |
| SITALL190_D     | DIAGNOSIS | chr3:47162558 | SETD2 | NM_014159 | V1190M                 | C                             | T     | Not available | 24710217  | T-cell Acute Lymphoblastic Leukemia | ETP               | MISSENSE     |
| SIBALL021373_D1 | DIAGNOSIS | chr3:47139530 | SETD2 | NM_014159 | R1686P                 | G                             | G     | Not available | 25207766  | B-cell Acute Lymphoblastic Leukemia | iAmp21 ALL        | MISSENSE     |
| SIBALL020469_D1 | DIAGNOSIS | chr3:47162371 | SETD2 | NM_014159 | S1252*                 | G                             | T     | Not available | 27776115  | B-cell Acute Lymphoblastic Leukemia | DUX4/ERG          | NONSENSE     |
| SIBALL020469_D1 | DIAGNOSIS | chr3:47162642 | SETD2 | NM_014159 | H1162Y                 | G                             | A     | Not available | 27776115  | B-cell Acute Lymphoblastic Leukemia | DUX4/ERG          | MISSENSE     |
| SIBALL020469_D1 | DIAGNOSIS | chr3:47163060 | SETD2 | NM_014159 | D1022E                 | G                             | T     | Not available | 27776115  | B-cell Acute Lymphoblastic Leukemia | DUX4/ERG          | MISSENSE     |
| SIBALL020469_D1 | DIAGNOSIS | chr3:47163481 | SETD2 | NM_014159 | S882C                  | G                             | C     | Not available | 27776115  | B-cell Acute Lymphoblastic Leukemia | DUX4/ERG          | MISSENSE     |
| SIBALL020469_D1 | DIAGNOSIS | chr3:47163512 | SETD2 | NM_014159 | Q872E                  | G                             | C     | Not available | 27776115  | B-cell Acute Lymphoblastic Leukemia | DUX4/ERG          | MISSENSE     |
| SIBALL020469_D1 | DIAGNOSIS | chr3:47163754 | SETD2 | NM_014159 | S791L                  | G                             | A     | Not available | 27776115  | B-cell Acute Lymphoblastic Leukemia | DUX4/ERG          | MISSENSE     |
| SIBALL020469_D1 | DIAGNOSIS | chr3:47164283 | SETD2 | NM_014159 | P615T                  | G                             | T     | Not available | 27776115  | B-cell Acute Lymphoblastic Leukemia | DUX4/ERG          | MISSENSE     |
| SIBALL020469_D1 | DIAGNOSIS | chr3:47164380 | SETD2 | NM_014159 | I582M                  | G                             | C     | Not available | 27776115  | B-cell Acute Lymphoblastic Leukemia | DUX4/ERG          | MISSENSE     |
| SIBALL020469_D1 | DIAGNOSIS | chr3:47165126 | SETD2 | NM_014159 | Q334E                  | G                             | C     | Not available | 27776115  | B-cell Acute Lymphoblastic Leukemia | DUX4/ERG          | MISSENSE     |
| SIBALL020469_D1 | DIAGNOSIS | chr3:47165321 | SETD2 | NM_014159 | Q269E                  | G                             | C     | Not available | 27776115  | B-cell Acute Lymphoblastic Leukemia | DUX4/ERG          | MISSENSE     |
| SIBALL020469_D1 | DIAGNOSIS | chr3:47165416 | SETD2 | NM_014159 | S237F                  | G                             | A     | Not available | 27776115  | B-cell Acute Lymphoblastic Leukemia | DUX4/ERG          | MISSENSE     |
| SIBALL021299_D1 | DIAGNOSIS | chr3:47163224 | SETD2 | NM_014159 | S968fs                 | ----                          | GCTT  | Not available | 27776115  | B-cell Acute Lymphoblastic Leukemia | DUX4/ERG          | FRAMESHIFT   |
| SIBALL021324_D1 | DIAGNOSIS | chr3:47165069 | SETD2 | NM_014159 | F351_K353>*            | TTTTAA                        | ----- | Not available | 27776115  | B-cell Acute Lymphoblastic Leukemia | DUX4/ERG          | PROTEINDEL   |
| SIBALL021372_D1 | DIAGNOSIS | chr3:47061276 | SETD2 | NM_014159 | K2469*                 | T                             | A     | Not available | 27776115  | B-cell Acute Lymphoblastic Leukemia | DUX4/ERG          | NONSENSE     |
| SIBALL021372_D1 | DIAGNOSIS | chr3:47155365 | SETD2 | NM_014159 | P1571_E5splice         | C                             | A     | Not available | 27776115  | B-cell Acute Lymphoblastic Leukemia | DUX4/ERG          | SPICE        |
| SIBALL021372_D1 | DIAGNOSIS | chr3:47059126 | SETD2 | NM_014159 | K2511_E20splice_region | --                            | CC    | Not available | 27776115  | B-cell Acute Lymphoblastic Leukemia | DUX4/ERG          | SPICE_REGION |
| SIBALL021514_D1 | DIAGNOSIS | chr3:47059133 | SETD2 | NM_014159 | R2510G                 | G                             | C     | Not available | 27776115  | B-cell Acute Lymphoblastic Leukemia | DUX4/ERG          | MISSENSE     |
| SIBALL021514_D1 | DIAGNOSIS | chr3:47165521 | SETD2 | NM_014159 | L202fs                 | AG                            | --    | Not available | 27776115  | B-cell Acute Lymphoblastic Leukemia | DUX4/ERG          | FRAMESHIFT   |
| SIERG005_D      | DIAGNOSIS | chr3:47165670 | SETD2 | NM_014159 | T152fs                 | -                             | A     | No            | 27776115  | B-cell Acute Lymphoblastic Leukemia | DUX4/ERG          | FRAMESHIFT   |
| SIERG018_D      | DIAGNOSIS | chr3:47162984 | SETD2 | NM_014159 | E1048Q                 | C                             | G     | Not available | 27776115  | B-cell Acute Lymphoblastic Leukemia | DUX4/ERG          | MISSENSE     |
| SIERG020051_D1  | DIAGNOSIS | chr3:47103774 | SETD2 | NM_014159 | N2058fs                | --                            | AT    | No            | 27776115  | B-cell Acute Lymphoblastic Leukemia | DUX4/ERG          | FRAMESHIFT   |
| SIERG020300_D1  | DIAGNOSIS | chr3:47155487 | SETD2 | NM_014159 | R1532fs                | --                            | CC    | No            | 27776115  | B-cell Acute Lymphoblastic Leukemia | DUX4/ERG          | FRAMESHIFT   |
| SIERG020306_D1  | DIAGNOSIS | chr3:47059135 | SETD2 | NM_014159 | K2506_A2509fs          | GCCAGATGTTT                   | ----- | No            | 27776115  | B-cell Acute Lymphoblastic Leukemia | DUX4/ERG          | FRAMESHIFT   |
| SIERG020306_D1  | DIAGNOSIS | chr3:47147612 | SETD2 | NM_014159 | S1572_E6splice         | ----                          | GGGGT | No            | 27776115  | B-cell Acute Lymphoblastic Leukemia | DUX4/ERG          | SPICE        |

## COSMIC Haematopoietic and Lymphoid Malignancies Cohort

| Sample                   | Genome pos.   | Gene  | isoform   | Mutation        | Ref                         | Alt | Pubmed ID | diagnosis                                                | Class      |
|--------------------------|---------------|-------|-----------|-----------------|-----------------------------|-----|-----------|----------------------------------------------------------|------------|
| PARGHW                   | chr3:47125721 | SETD2 | NM_014159 | R1850fs         | -                           | CC  | 25790293  | acute_lymphoblastic_B_cell_leukaemia                     | FRAMESHIFT |
| 4-1044673-T1             | chr3:47158132 | SETD2 | NM_014159 | R1523C          | G                           | A   | 25105841  | acute_lymphoblastic_B_cell_leukaemia                     | MISSENSE   |
| PARFTR                   | chr3:47147534 | SETD2 | NM_014159 | R1598*          | A                           | A   | 25790293  | acute_lymphoblastic_B_cell_leukaemia                     | NONSENSE   |
| SIBALL021373_D1          | chr3:47139530 | SETD2 | NM_014159 | R1686P          | C                           | G   | 25207766  | acute_lymphoblastic_B_cell_leukaemia                     | MISSENSE   |
| TL04                     | chr3:47164536 | SETD2 | NM_014159 | C530fs          | -                           | C   | 26206799  | acute_lymphoblastic_T_cell_leukaemia                     | FRAMESHIFT |
| TL17                     | chr3:47163586 | SETD2 | NM_014159 | F847fs          | -                           | G   | 26206799  | acute_lymphoblastic_T_cell_leukaemia                     | FRAMESHIFT |
| 6831                     | chr3:47162236 | SETD2 | NM_014159 | R1297fs         | -                           | T   | 26206799  | acute_lymphoblastic_T_cell_leukaemia                     | FRAMESHIFT |
| TL43                     | chr3:47164342 | SETD2 | NM_014159 | S595fs          | -                           | T   | 26206799  | acute_lymphoblastic_T_cell_leukaemia                     | FRAMESHIFT |
| TLE34                    | chr3:47144862 | SETD2 | NM_014159 | C1631S          | A                           | T   | 23263491  | acute_lymphoblastic_T_cell_leukaemia                     | MISSENSE   |
| TL87                     | chr3:47165536 | SETD2 | NM_014159 | A197fs          | G                           | AG  | 26206799  | acute_lymphoblastic_T_cell_leukaemia                     | FRAMESHIFT |
| SJTALL190                | chr3:47162558 | SETD2 | NM_014159 | V1190M          | C                           | T   | 22237106  | acute_lymphoblastic_T_cell_leukaemia                     | MISSENSE   |
| SJTALL173                | chr3:47155452 | SETD2 | NM_014159 | P1534_R1543fs   | CCGCTATTGGAAACAATAATCCCCATT | -   | 22237106  | acute_lymphoblastic_T_cell_leukaemia                     | FRAMESHIFT |
| SJTALL199                | chr3:47164805 | SETD2 | NM_014159 | R441*           | G                           | A   | 22237106  | acute_lymphoblastic_T_cell_leukaemia                     | NONSENSE   |
| CN-AML-CR-64-Dx          | chr3:47144879 | SETD2 | NM_014159 | R1625H          | C                           | T   |           | acute_myeloid_leukaemia                                  | MISSENSE   |
| SNUH_G16_S1              | chr3:47162886 | SETD2 | NM_014159 | M1080I          | C                           | A   |           | acute_myeloid_leukaemia                                  | MISSENSE   |
| CN-AML-CR-64-Dx          | chr3:47125269 | SETD2 | NM_014159 | K2001*          | T                           | A   |           | acute_myeloid_leukaemia                                  | NONSENSE   |
| TARGET-20-PARBIU-04A-01D | chr3:47161717 | SETD2 | NM_014159 | P1470L          | G                           | A   |           | acute_myeloid_leukaemia                                  | MISSENSE   |
| TARGET-20-PATDNN-04A-01D | chr3:47125573 | SETD2 | NM_014159 | E1899fs         | -                           | G   |           | acute_myeloid_leukaemia                                  | FRAMESHIFT |
| TARGET-20-PATDNN-09A-01D | chr3:47125573 | SETD2 | NM_014159 | E1899fs         | -                           | G   |           | acute_myeloid_leukaemia                                  | FRAMESHIFT |
| TARGET-20-PARASV-04A-02D | chr3:47125223 | SETD2 | NM_014159 | W2016*          | C                           | T   |           | acute_myeloid_leukaemia                                  | NONSENSE   |
| CN-AML-NR-18-Dx          | chr3:47165275 | SETD2 | NM_014159 | S284Y           | G                           | T   |           | acute_myeloid_leukaemia                                  | MISSENSE   |
| CN-AML-18-T              | chr3:47165275 | SETD2 | NM_014159 | S284Y           | G                           | T   |           | acute_myeloid_leukaemia                                  | MISSENSE   |
| ATL410                   | chr3:47165283 | SETD2 | NM_014159 | K281fs          | T                           | -   | 26437031  | adult_T_cell_lymphoma-leukaemia                          | FRAMESHIFT |
| ATL014                   | chr3:47165765 | SETD2 | NM_014159 | G121S           | C                           | T   | 26437031  | adult_T_cell_lymphoma-leukaemia                          | MISSENSE   |
| ATL382                   | chr3:47125755 | SETD2 | NM_014159 | E1839*          | C                           | A   | 26437031  | adult_T_cell_lymphoma-leukaemia                          | NONSENSE   |
| ATL309                   | chr3:47161709 | SETD2 | NM_014159 | F1473L          | A                           | G   | 26437031  | adult_T_cell_lymphoma-leukaemia                          | MISSENSE   |
| ATL074                   | chr3:47059193 | SETD2 | NM_014159 | R2490W          | G                           | A   | 26437031  | adult_T_cell_lymphoma-leukaemia                          | MISSENSE   |
| ATL246                   | chr3:47161709 | SETD2 | NM_014159 | F1473L          | A                           | G   | 26437031  | adult_T_cell_lymphoma-leukaemia                          | MISSENSE   |
| ATL376                   | chr3:47164157 | SETD2 | NM_014159 | K657*           | T                           | A   | 26437031  | adult_T_cell_lymphoma-leukaemia                          | NONSENSE   |
| ATL050                   | chr3:47165560 | SETD2 | NM_014159 | S189F           | G                           | A   | 26437031  | adult_T_cell_lymphoma-leukaemia                          | MISSENSE   |
| ATL376                   | chr3:47163860 | SETD2 | NM_014159 | H756N           | G                           | T   | 26437031  | adult_T_cell_lymphoma-leukaemia                          | MISSENSE   |
| ATL376                   | chr3:47164154 | SETD2 | NM_014159 | V658L           | C                           | A   | 26437031  | adult_T_cell_lymphoma-leukaemia                          | MISSENSE   |
| ATL093                   | chr3:47129662 | SETD2 | NM_014159 | R1740W          | G                           | A   | 26437031  | adult_T_cell_lymphoma-leukaemia                          | MISSENSE   |
| ATL320                   | chr3:47098435 | SETD2 | NM_014159 | V2280fs         | -                           | A   | 26437031  | adult_T_cell_lymphoma-leukaemia                          | FRAMESHIFT |
| ATLL_A-01                | chr3:47165765 | SETD2 | NM_014159 | G121S           | C                           | T   | 26574607  | adult_T_cell_lymphoma-leukaemia                          | MISSENSE   |
| ATL067                   | chr3:47162434 | SETD2 | NM_014159 | G1231E          | C                           | T   | 26437031  | adult_T_cell_lymphoma-leukaemia                          | MISSENSE   |
| ATL088                   | chr3:47164103 | SETD2 | NM_014159 | G675R           | C                           | G   | 26437031  | adult_T_cell_lymphoma-leukaemia                          | MISSENSE   |
| 56                       | chr3:47164880 | SETD2 | NM_014159 | N416Y           | T                           | A   | 24345752  | angioblastic_T_cell_lymphoma                             | MISSENSE   |
| 23                       | chr3:47165845 | SETD2 | NM_014159 | N94S            | T                           | C   | 24345752  | angioblastic_T_cell_lymphoma                             | MISSENSE   |
| 015-08-01TD              | chr3:47163901 | SETD2 | NM_014159 | S742*           | G                           | C   |           | chronic_lymphocytic_leukaemia-small_lymphocytic_lymphoma | NONSENSE   |
| 141-02-3TD               | chr3:47088090 | SETD2 | NM_014159 | Q2329*          | G                           | A   |           | chronic_lymphocytic_leukaemia-small_lymphocytic_lymphoma | NONSENSE   |
| 141-02-3TD               | chr3:47087975 | SETD2 | NM_014159 | P2366_E16splice | A                           | C   |           | chronic_lymphocytic_leukaemia-small_lymphocytic_lymphoma | SPICE      |
| S21_post                 | chr3:47162208 | SETD2 | NM_014159 | W1306*          | C                           | T   | 26675346  | chronic_lymphocytic_leukaemia-small_lymphocytic_lymphoma | NONSENSE   |
| 177-01-9TD               | chr3:47162250 | SETD2 | NM_014159 | Q1292fs         | C                           | -   |           | chronic_lymphocytic_leukaemia-small_lymphocytic_lymphoma | FRAMESHIFT |
| DLBCL1052                | chr3:47147599 | SETD2 | NM_014159 | V1576G          | A                           | C   | 23292937  | diffuse_large_B_cell_lymphoma                            | MISSENSE   |
| DLBCL759                 | chr3:47163847 | SETD2 | NM_014159 | L760P           | A                           | G   | 23292937  | diffuse_large_B_cell_lymphoma                            | MISSENSE   |
| U2932                    | chr3:47163470 | SETD2 | NM_014159 | L886V           | G                           | C   | 23292937  | diffuse_large_B_cell_lymphoma                            | MISSENSE   |
| DLBCL806                 | chr3:47163843 | SETD2 | NM_014159 | M761I           | C                           | T   | 23292937  | diffuse_large_B_cell_lymphoma                            | MISSENSE   |
| DLBCL890                 | chr3:47142966 | SETD2 | NM_014159 | Y1666C          | T                           | C   | 23292937  | diffuse_large_B_cell_lymphoma                            | MISSENSE   |
| Ly1                      | chr3:47098389 | SETD2 | NM_014159 | I2295M          | T                           | C   | 23292937  | diffuse_large_B_cell_lymphoma                            | MISSENSE   |
| TMD8                     | chr3:47079245 | SETD2 | NM_014159 | T2421A          | T                           | C   | 23292937  | diffuse_large_B_cell_lymphoma                            | MISSENSE   |
| Ly10                     | chr3:47163470 | SETD2 | NM_014159 | L886V           | G                           | C   | 23292937  | diffuse_large_B_cell_lymphoma                            | MISSENSE   |
| BL26                     | chr3:47059161 | SETD2 | NM_014159 | T2500del        | GGT                         | -   | 24241536  | hairy_cell_leukaemia                                     | PROTEINDEL |
| LOXIMVI                  | chr3:47144880 | SETD2 | NM_014159 | R1625C          | G                           | A   | 23856246  | hairy_cell_leukaemia                                     | MISSENSE   |



**Supplementary Table 2: small guide sequences and primers used**

All genomic coordinators are for GRCh37/hg19 (human) or mm10 (mouse)

| sgRNA name                      | Sequence (without PAM) | Reverse complement (without PAM) | Genomic Coordinate         |
|---------------------------------|------------------------|----------------------------------|----------------------------|
| Human <i>SETD2</i> exon 3 sgRNA | AATAGGTTTCTCACTGCACT   | AGTGCAGTGAGAAACCTATT             | chr3:47165851 - 47165870   |
| Mouse <i>Setd2</i> exon 3 sgRNA | TCAAGTCGATTTTTGCCCAA   | TTGGGCAAAAATCGACTTGA             | chr9:110547272 - 110547294 |
| Human <i>MSH6</i> sgRNA         | CTTGGGGAAGAAGCTGTACA   | TGTACAGCTTCTTCCCAAG              | chr2:48010392 - 48010411   |

| Sequencing primer              | Primer Sequence        | Genomic Coordinate         |
|--------------------------------|------------------------|----------------------------|
| Human <i>SETD2</i> ex3 forward | GTGGCCTGGATGTTACATGA   | chr3:47165660 - 47165679   |
| Human <i>SETD2</i> ex3 reverse | GAAGAACAGGGACGACAGAAG  | chr3:47165910 - 47165930   |
| Mouse <i>Setd2</i> ex3 forward | AACAGGTTTCATCAAAGGACCA | chr9:110547232 - 110547253 |
| Mouse <i>Setd2</i> ex3 reverse | GGGAGTTTGGAGAATCACTTTG | chr9:110547410 - 110547431 |
| Human <i>MSH6</i> ex1 forward  | CGGTAGATGCGGTGCTTT     | chr2:48010309 - 48010326   |
| Human <i>MSH6</i> ex1 reverse  | GAGGTTCTTCGCCTTGGG     | chr2:48010571 - 48010588   |

**Supplementary Table 3: Novel clonal mutations identified in 6-thioguanine treated MOLM-13 subclones***Variants present in the respective pre-treatment subclone were subtracted the variants from each post treatment subclone*

MOLM-13 Isogenic control no treatment subclone

No new mutations identified from pretreatment subclone

MOLM-13 Isogenic control 6-TG treated subclone 1

| Chrom | Position  | Ref | Var | Gene    | cDNA     | aa       | Allele Fraction | Fold Coverage |
|-------|-----------|-----|-----|---------|----------|----------|-----------------|---------------|
| 1     | 156348109 | C   | T   | RHBG    | c.C592T  | p.R198W  | 39.7%           | 73            |
| 2     | 183291310 | G   | T   | PDE1A   | c.C48A   | p.I16I   | 47.5%           | 61            |
| 3     | 14536386  | G   | C   | GRIP2   | c.C3228G | p.R1076G | 55.6%           | 36            |
| 4     | 126238764 | G   | A   | FAT4    | c.G1198A | p.G400R  | 42.7%           | 75            |
| 5     | 132149747 | C   | T   | SOWAHA  | c.C434T  | p.P145L  | 54.6%           | 33            |
| 7     | 146825798 | G   | A   | CNTNAP2 | c.G953A  | p.G318D  | 57.5%           | 40            |
| 10    | 116049050 | G   | A   | VWA2    | c.G1924A | p.G642R  | 36.8%           | 114           |
| 13    | 67801322  | G   | A   | PCDH9   | c.C1251T | p.N417N  | 35.1%           | 97            |
| 14    | 23858825  | C   | T   | MYH6    | c.G3836A | p.R1279Q | 36.4%           | 66            |
| 14    | 33290632  | G   | A   | AKAP6   | c.G3613A | p.G1205S | 53.3%           | 75            |
| 16    | 72984471  | A   | C   | ZFH3    | c.T371G  | p.V124G  | 43.6%           | 55            |
| 16    | 72984473  | G   | T   | ZFH3    | c.C369A  | p.P123P  | 44.1%           | 59            |
| 20    | 48129748  | G   | A   | PTGIS   | c.C1075T | p.R359C  | 38.9%           | 36            |
| 21    | 43248687  | C   | T   | PRDM15  | c.G2467A | p.D823N  | 58.3%           | 60            |

MOLM-13 Isogenic control 6-TG treated subclone 2

| Chrom | Position  | Ref | Var | Gene     | cDNA       | aa       | Allele Fraction | Fold Coverage |
|-------|-----------|-----|-----|----------|------------|----------|-----------------|---------------|
| 1     | 78267110  | G   | A   | FAM73A   | c.G290A    | p.R97H   | 45.5%           | 22            |
| 1     | 160523933 | C   | T   | CD84     | c.G392A    | p.R131Q  | 35.7%           | 56            |
| 2     | 27445074  | G   | A   | CAD      | c.G365A    | p.R122Q  | 46.3%           | 54            |
| 2     | 165947098 | G   | T   | SCN3A    | c.C5565A   | p.A1855A | 46.0%           | 74            |
| 3     | 42577714  | C   | T   | VIPR1    | c.C1171T   | p.R391C  | 48.8%           | 43            |
| 3     | 140123527 | G   | A   | CLSTN2   | c.G556A    | p.E186K  | 39.7%           | 58            |
| 5     | 140262837 | T   | C   | PCDHA13  | c.T984C    | p.I328I  | 41.2%           | 97            |
| 5     | 140263396 | G   | A   | PCDHA13  | c.G1543A   | p.G515S  | 53.1%           | 32            |
| 6     | 82459582  | G   | A   | FAM46A   | c.C1159T   | p.R387W  | 31.9%           | 182           |
| 6     | 82459600  | T   | A   | FAM46A   | c.A1141T   | p.I381F  | 31.6%           | 187           |
| 6     | 93964506  | T   | G   | EPHA7    | c.A2391C   | p.K797N  | 37.9%           | 103           |
| 6     | 138550972 | G   | A   | KIAA1244 | c.G403A    | p.V135M  | 38.9%           | 108           |
| 7     | 82583766  | T   | C   | PCLO     | c.A6503G   | p.E2168G | 48.1%           | 104           |
| 7     | 122763200 | C   | A   | SLC13A1  | c.G1330T   | p.A444S  | 50.8%           | 67            |
| 8     | 90993682  | C   | G   | NBN      | c.G241C    | p.E81Q   | 35.0%           | 40            |
| 9     | 134357188 | C   | A   | PRRC2B   | c.C4976A   | p.S1659Y | 54.6%           | 44            |
| 11    | 70202345  | G   | A   | PPFIA1   | c.G2567A   | p.R856H  | 46.4%           | 56            |
| 13    | 74289519  | C   | T   | KLF12    | c.G1013A   | p.R338Q  | 32.1%           | 55            |
| 13    | 110435630 | A   | C   | IRS2     | c.T2771G   | p.F924C  | 38.5%           | 78            |
| 14    | 90769118  | C   | A   | NRDE2    | c.G1357T   | p.D453Y  | 55.9%           | 59            |
| 14    | 105397094 | G   | A   | PLD4     | c.G733A    | p.A245T  | 52.9%           | 68            |
| 15    | 99672279  | C   | A   | SYNM     | c.C3716A   | p.G1238A | 30.5%           | 141           |
| 16    | 56866295  | A   | G   | NUP93    | c.A971G    | p.D324G  | 61.5%           | 52            |
| 16    | 72845599  | C   | T   | ZFH3     | c.G999A    | p.S333S  | 47.4%           | 38            |
| 16    | 89764248  | G   | -   | SPATA2L  | c.769delC  | p.L257fs | 40.4%           | 99            |
| 17    | 6676430   | A   | G   | XAF1     | c.850-2A>G |          | 45.8%           | 24            |

|    |          |   |   |          |          |          |        |     |
|----|----------|---|---|----------|----------|----------|--------|-----|
| 17 | 27935921 | C | T | ANKRD13B | c.C474T  | p.S158S  | 46.9%  | 128 |
| 17 | 60769650 | G | A | MRC2     | c.G4278A | p.L1426L | 43.5%  | 46  |
| 17 | 76491149 | T | C | DNAH17   | c.A5934G | p.E1978E | 45.8%  | 48  |
| 19 | 17008740 | C | T | CPAMD8   | c.G5055A | p.T1685T | 38.4%  | 125 |
| 19 | 33642127 | C | T | WDR88    | c.C720T  | p.P240P  | 31.3%  | 64  |
| 23 | 57935902 | T | C | ZXDA     | c.A953G  | p.K318R  | 100.0% | 29  |

MOLM-13 Isogenic control 6-TG treated subclone 3

| Chrom | Position  | Ref | Var | Gene     | cDNA     | aa      | Allele Fraction | Fold Coverage |
|-------|-----------|-----|-----|----------|----------|---------|-----------------|---------------|
| 1     | 156347917 | C   | T   | RHBG     | c.C511T  | p.L171F | 39.4%           | 66            |
| 3     | 151011994 | G   | A   | GPR87    | c.C1040T | p.S347L | 50.0%           | 46            |
| 4     | 8583363   | C   | T   | GPR78    | c.C654T  | p.A218A | 42.3%           | 52            |
| 5     | 145439604 | G   | A   | SH3RF2   | c.G1731A | p.T577T | 52.9%           | 70            |
| 6     | 110301098 | G   | A   | GPR6     | c.G783A  | p.L261L | 34.2%           | 79            |
| 8     | 1871138   | T   | C   | ARHGEF10 | c.T2152C | p.Y718H | 38.1%           | 21            |
| 9     | 127215404 | T   | C   | GPR144   | c.T428C  | p.L143P | 45.5%           | 22            |
| 9     | 131296165 | G   | T   | GLE1     | c.G1581T | p.K527N | 50.0%           | 44            |
| 11    | 4621850   | G   | A   | TRIM68   | c.C1114T | p.L372L | 47.0%           | 66            |
| 11    | 6422898   | C   | T   | APBB1    | c.G632A  | p.R211H | 43.5%           | 138           |
| 11    | 62455503  | C   | T   | LRRN4CL  | c.G478A  | p.G160R | 53.3%           | 92            |
| 13    | 43934166  | C   | A   | ENOX1    | c.G410T  | p.R137L | 30.4%           | 79            |
| 13    | 97999300  | C   | A   | MBNL2    | c.C783A  | p.A261A | 48.4%           | 31            |
| 16    | 3142715   | G   | A   | ZSCAN10  | c.C59T   | p.P20L  | 47.2%           | 53            |
| 16    | 30667382  | G   | A   | PRR14    | c.G1508A | p.R503Q | 51.4%           | 111           |
| 19    | 7619455   | G   | C   | PNPLA6   | c.G2480C | p.R827P | 35.9%           | 64            |
| 19    | 39963862  | G   | A   | SUPT5H   | c.G2278A | p.G760S | 32.6%           | 141           |
| 19    | 51298137  | C   | G   | ACPT     | c.C1081G | p.R361G | 51.0%           | 49            |
| 20    | 10604012  | C   | T   | SLX4IP   | c.C1212T | p.Y404Y | 53.9%           | 39            |
| 22    | 42294681  | G   | A   | SREBF2   | c.G2634A | p.T878T | 39.4%           | 33            |
| 23    | 153674034 | G   | A   | FAM50A   | c.G165A  | p.A55A  | 100.0%          | 22            |

MOLM-13 Isogenic control 6-TG treated subclone 4

| Chrom | Position  | Ref | Var | Gene     | cDNA     | aa       | Allele Fraction | Fold Coverage |
|-------|-----------|-----|-----|----------|----------|----------|-----------------|---------------|
| 1     | 1277511   | C   | T   | DVL1     | c.G388A  | p.G130R  | 50.0%           | 54            |
| 1     | 27697450  | C   | A   | FCN3     | c.G407T  | p.R136L  | 52.0%           | 25            |
| 1     | 40702413  | G   | T   | RLF      | c.G2039T | p.R680L  | 39.3%           | 83            |
| 1     | 75038380  | C   | G   | C1orf173 | c.G3014C | p.R1005P | 48.7%           | 117           |
| 4     | 42400255  | C   | T   | SHISA3   | c.C182T  | p.A61V   | 53.9%           | 39            |
| 4     | 183721223 | G   | A   | TENM3    | c.G7819A | p.V2607M | 42.0%           | 69            |
| 8     | 125061938 | C   | T   | FER1L6   | c.C2815T | p.P939S  | 41.9%           | 31            |
| 10    | 64028317  | G   | A   | RTKN2    | c.C53T   | p.T18I   | 31.0%           | 71            |
| 10    | 126715250 | C   | T   | CTBP2    | c.G1079A | p.R360Q  | 39.7%           | 58            |
| 11    | 73130956  | G   | A   | FAM168A  | c.C240T  | p.T80T   | 50.0%           | 12            |
| 12    | 120784115 | G   | C   | MSI1     | c.C870G  | p.P290P  | 39.6%           | 48            |
| 14    | 103410510 | C   | T   | CDC42BPB | c.G4126A | p.V1376M | 48.6%           | 72            |
| 15    | 73615848  | C   | A   | HCN4     | c.G2586T | p.L862L  | 41.7%           | 36            |
| 15    | 83335614  | C   | T   | AP3B2    | c.G1737A | p.A579A  | 48.5%           | 33            |
| 16    | 310005    | G   | A   | ITFG3    | c.G423A  | p.S141S  | 42.4%           | 33            |
| 16    | 734820    | C   | T   | WDR24    | c.G2287A | p.G763S  | 52.5%           | 40            |
| 17    | 79860510  | G   | C   | NPB      | c.G264C  | p.Q88H   | 50.0%           | 38            |

|    |          |   |   |        |          |          |       |    |
|----|----------|---|---|--------|----------|----------|-------|----|
| 19 | 15734844 | A | T | CYP4F8 | c.A1055T | p.E351V  | 30.2% | 43 |
| 19 | 48953937 | G | A | GRWD1  | c.G697A  | p.G233S  | 53.9% | 52 |
| 21 | 32493037 | G | C | TIAM1  | c.C4425G | p.P1475P | 55.9% | 93 |
| 22 | 31979878 | G | A | SFI1   | c.G1020A | p.W340X  | 36.4% | 22 |
| 22 | 31979889 | G | A | SFI1   | c.G1031A | p.R344Q  | 42.9% | 21 |
| 22 | 46725991 | C | G | GTSE1  | c.C2184G | p.D728E  | 62.2% | 45 |

MOLM-13 Isogenic control 6-TG treated subclone 5

| Chrom | Position  | Ref | Var | Gene    | cDNA     | aa       | Allele Fraction | Fold Coverage |
|-------|-----------|-----|-----|---------|----------|----------|-----------------|---------------|
| 1     | 156348109 | C   | T   | RHBG    | c.C592T  | p.R198W  | 36.9%           | 84            |
| 2     | 183291310 | G   | T   | PDE1A   | c.C48A   | p.I16I   | 45.8%           | 48            |
| 3     | 14536386  | G   | C   | GRIP2   | c.C3228G | p.R1076G | 56.1%           | 41            |
| 4     | 126238764 | G   | A   | FAT4    | c.G1198A | p.G400R  | 49.5%           | 93            |
| 5     | 132149747 | C   | T   | SOWAHA  | c.C434T  | p.P145L  | 46.9%           | 32            |
| 7     | 146825798 | G   | A   | CNTNAP2 | c.G953A  | p.G318D  | 53.6%           | 56            |
| 10    | 116049050 | G   | A   | VWA2    | c.G1924A | p.G642R  | 32.0%           | 122           |
| 13    | 67801322  | G   | A   | PCDH9   | c.C1251T | p.N417N  | 30.1%           | 113           |
| 14    | 23858825  | C   | T   | MYH6    | c.G3836A | p.R1279Q | 34.7%           | 75            |
| 14    | 33290632  | G   | A   | AKAP6   | c.G3613A | p.G1205S | 55.6%           | 72            |
| 16    | 72984471  | A   | C   | ZFH3    | c.T371G  | p.V124G  | 37.9%           | 58            |
| 16    | 72984473  | G   | T   | ZFH3    | c.C369A  | p.P123P  | 40.0%           | 60            |
| 20    | 48129748  | G   | A   | PTGIS   | c.C1075T | p.R359C  | 52.6%           | 19            |
| 21    | 43248687  | C   | T   | PRDM15  | c.G2467A | p.D823N  | 58.5%           | 53            |

MOLM-13 Isogenic control 6-TG treated subclone 6

| Chrom | Position  | Ref | Var | Gene     | cDNA      | aa       | Allele Fraction | Fold Coverage |
|-------|-----------|-----|-----|----------|-----------|----------|-----------------|---------------|
| 1     | 1887180   | C   | T   | KIAA1751 | c.G2126A  | p.R709Q  | 48.1%           | 52            |
| 1     | 10336391  | G   | A   | KIF1B    | c.G953A   | p.R318Q  | 30.3%           | 76            |
| 1     | 16053810  | G   | A   | PLEKHM2  | c.G1243A  | p.D415N  | 43.3%           | 67            |
| 1     | 89734520  | C   | A   | GBP5     | c.G210T   | p.T70T   | 55.1%           | 49            |
| 1     | 231339670 | C   | T   | TRIM67   | c.C1592T  | p.T531M  | 37.0%           | 54            |
| 1     | 237791239 | G   | A   | RYR2     | c.G6299A  | p.R2100Q | 34.3%           | 105           |
| 3     | 49314156  | G   | A   | C3orf62  | c.C150T   | p.S50S   | 40.6%           | 69            |
| 4     | 126412621 | G   | T   | FAT4     | c.G14644T | p.D4882Y | 48.1%           | 79            |
| 4     | 144135928 | G   | C   | USP38    | c.G2799C  | p.T933T  | 45.3%           | 64            |
| 5     | 115782861 | G   | A   | SEMA6A   | c.C2541T  | p.A847A  | 60.0%           | 104           |
| 6     | 30593405  | A   | C   | MRPS18B  | c.A608C   | p.Y203S  | 31.8%           | 66            |
| 6     | 30879211  | C   | A   | GTF2H4   | c.C676A   | p.R226R  | 38.5%           | 64            |
| 6     | 30879212  | G   | A   | GTF2H4   | c.G677A   | p.R226Q  | 39.7%           | 63            |
| 6     | 46684751  | G   | A   | PLA2G7   | c.C192T   | p.S64S   | 32.7%           | 107           |
| 9     | 100854208 | C   | A   | TRIM14   | c.G776T   | p.R259L  | 45.8%           | 24            |
| 11    | 11454221  | G   | A   | GALNTL4  | c.C542T   | p.T181M  | 53.1%           | 64            |
| 11    | 102395704 | G   | A   | MMP7     | c.C576T   | p.F192F  | 50.0%           | 24            |
| 15    | 40544553  | C   | T   | C15orf56 | c.G419A   | p.R140Q  | 54.3%           | 35            |
| 17    | 31091908  | G   | A   | MYO1D    | c.C1023T  | p.D341D  | 40.9%           | 22            |
| 19    | 10224556  | C   | G   | P2RY11   | c.C267G   | p.L89L   | 38.3%           | 128           |
| 20    | 61299525  | G   | A   | SLCO4A1  | c.G1800A  | p.T600T  | 54.1%           | 74            |
| 21    | 42749766  | C   | A   | MX2      | c.C300A   | p.C100X  | 57.8%           | 44            |

MOLM-13 SETD2 clone 1 no treatment subclone

| Chrom | Position | Ref | Var | Gene  | cDNA     | aa      | Allele Fraction | Fold Coverage |
|-------|----------|-----|-----|-------|----------|---------|-----------------|---------------|
| 7     | 92123640 | T   | C   | PEX1  | c.A2997G | p.L999L | 37.5%           | 32            |
| 16    | 20803378 | G   | A   | ACSM3 | c.G1381A | p.D461N | 51.9%           | 104           |
| 19    | 7267663  | G   | A   | INSR  | c.C345T  | p.F115F | 35.1%           | 111           |
| 19    | 18332952 | C   | T   | PDE4C | c.G424A  | p.A142T | 41.0%           | 39            |

MOLM-13 SETD2 clone 1 6-TG treated subclone 1

| Chrom | Position  | Ref | Var | Gene      | cDNA      | aa       | Allele Fraction | Fold Coverage |
|-------|-----------|-----|-----|-----------|-----------|----------|-----------------|---------------|
| 1     | 9416635   | G   | C   | SPSB1     | c.G685C   | p.G229R  | 42.4%           | 59            |
| 1     | 112269921 | C   | T   | FAM212B   | c.G563A   | p.R188H  | 44.5%           | 137           |
| 1     | 151065741 | G   | A   | GABPB2    | c.G350A   | p.R117Q  | 33.9%           | 62            |
| 1     | 155429656 | C   | T   | ASH1L     | c.G5018A  | p.R1673Q | 33.9%           | 59            |
| 1     | 226574110 | C   | T   | PARP1     | c.G751A   | p.E251K  | 29.4%           | 34            |
| 1     | 228475649 | C   | T   | OBSCN     | c.C11086T | p.L3696F | 35.8%           | 165           |
| 2     | 144903256 | C   | T   | GTDC1     | c.G230A   | p.R77Q   | 57.9%           | 57            |
| 2     | 220348881 | C   | A   | SPEG      | c.C6696A  | p.P2232P | 58.1%           | 86            |
| 3     | 52840153  | T   | C   | ITIH3     | c.T1943C  | p.Y647Y  | 52.9%           | 51            |
| 4     | 83838545  | G   | A   | THAP9     | c.G1180A  | p.D394N  | 58.1%           | 129           |
| 4     | 154243913 | C   | T   | TRIM2     | c.C1896T  | p.N632N  | 46.7%           | 30            |
| 4     | 155412111 | G   | A   | DCHS2     | c.C397T   | p.R133C  | 44.2%           | 52            |
| 4     | 186573876 | C   | T   | SORBS2    | c.G31A    | p.D11N   | 57.1%           | 56            |
| 5     | 169230141 | G   | A   | DOCK2     | c.G2634A  | p.Q878Q  | 53.6%           | 28            |
| 6     | 13597247  | C   | G   | SIRT5     | c.C294G   | p.R98G   | 25.9%           | 108           |
| 6     | 26252176  | C   | T   | HIST1H2BH | c.C298T   | p.R100C  | 34.2%           | 82            |
| 6     | 30037001  | G   | A   | PPP1R11   | c.G299A   | p.R100H  | 33.3%           | 48            |
| 6     | 34100794  | C   | T   | GRM4      | c.G480A   | p.S160S  | 25.0%           | 148           |
| 6     | 99848490  | G   | A   | PNISR     | c.C2344T  | p.R782X  | 30.1%           | 156           |
| 6     | 147047289 | T   | C   | ADGB      | c.T2308C  | p.F770L  | 30.3%           | 122           |
| 7     | 45120355  | C   | T   | NACAD     | c.G4558A  | p.E1520K | 50.8%           | 67            |
| 8     | 145012372 | G   | A   | PLEC      | c.C115T   | p.R39C   | 27.0%           | 63            |
| 9     | 34996776  | C   | T   | DNAJB5    | c.C942T   | p.I314I  | 52.6%           | 78            |
| 9     | 35740951  | G   | A   | GBA2      | c.C897T   | p.D299D  | 51.6%           | 97            |
| 9     | 93606245  | G   | A   | SYK       | c.G65A    | p.R22Q   | 47.9%           | 48            |
| 9     | 96054847  | G   | A   | WNK2      | c.G5100A  | p.S1700S | 63.0%           | 81            |
| 10    | 88415952  | C   | T   | OPN4      | c.C185T   | p.T62M   | 35.6%           | 73            |
| 10    | 133787409 | C   | T   | BNIP3     | c.G85A    | p.G29R   | 29.7%           | 37            |
| 12    | 52713145  | G   | A   | KRT83     | c.C388T   | p.R130C  | 51.7%           | 29            |
| 12    | 113629398 | C   | T   | C12orf52  | c.C586T   | p.R196W  | 34.4%           | 150           |
| 12    | 133294343 | G   | A   | PGAM5     | c.G544A   | p.E182K  | 43.2%           | 43            |
| 13    | 28498641  | G   | T   | PDX1      | c.G655T   | p.G219W  | 25.0%           | 16            |
| 13    | 28542991  | C   | T   | CDX2      | c.G153A   | p.A51A   | 37.9%           | 87            |
| 14    | 50734598  | C   | T   | L2HGDH    | c.G937A   | p.V313I  | 47.1%           | 70            |
| 14    | 102973937 | C   | T   | ANKRD9    | c.G290A   | p.R97Q   | 47.1%           | 17            |
| 15    | 65621374  | G   | A   | IGDCC3    | c.C2318T  | p.T773M  | 46.5%           | 43            |
| 15    | 66015267  | C   | T   | DENND4A   | c.G1507A  | p.V503I  | 35.1%           | 37            |
| 15    | 101569375 | G   | A   | LRRK1     | c.G2901A  | p.T967T  | 44.8%           | 67            |
| 16    | 15122739  | G   | A   | PDXDC1    | c.G1209A  | p.P403P  | 44.4%           | 18            |
| 16    | 25238440  | G   | A   | AQP8      | c.G654A   | p.A218A  | 45.5%           | 77            |
| 16    | 71571025  | C   | T   | CHST4     | c.C445T   | p.R149W  | 45.5%           | 132           |
| 16    | 75148128  | C   | T   | LDHD      | c.G634A   | p.G212S  | 47.3%           | 55            |

|    |           |   |   |         |          |          |        |     |
|----|-----------|---|---|---------|----------|----------|--------|-----|
| 16 | 84353089  | G | A | WFDC1   | c.G474A  | p.S158S  | 65.0%  | 40  |
| 17 | 10543394  | C | T | MYH3    | c.G2601A | p.S867S  | 55.4%  | 74  |
| 17 | 35299591  | G | A | LHX1    | c.G770A  | p.R257Q  | 58.3%  | 24  |
| 17 | 37762108  | C | T | NEUROD2 | c.G745A  | p.A249T  | 59.6%  | 52  |
| 19 | 1986631   | G | A | BTBD2   | c.C1434T | p.Y478Y  | 36.7%  | 60  |
| 19 | 3526383   | C | T | FZR1    | c.C388T  | p.T129M  | 31.0%  | 42  |
| 19 | 3833724   | G | A | ZFR2    | c.C317T  | p.P106L  | 31.5%  | 73  |
| 19 | 12902612  | C | A | JUNB    | c.C27A   | p.F9L    | 34.4%  | 151 |
| 19 | 18054501  | G | A | CCDC124 | c.G649A  | p.V217M  | 44.0%  | 91  |
| 19 | 44351826  | G | A | ZNF283  | c.G1073A | p.R358H  | 53.9%  | 78  |
| 20 | 55026995  | G | A | CASS4   | c.G601A  | p.V201I  | 46.3%  | 67  |
| 21 | 38480702  | G | A | TTC3    | c.G856A  | p.G286S  | 55.0%  | 20  |
| 21 | 42551516  | G | T | PLAC4   | c.C40A   | p.L14I   | 44.4%  | 9   |
| 23 | 15373324  | G | A | FIGF    | c.C589T  | p.R197C  | 100.0% | 36  |
| 23 | 152845617 | C | T | ATP2B3  | c.C3524T | p.P1175L | 100.0% | 54  |

MOLM-13 SETD2 clone 1 6-TG treated subclone 2

| Chrom | Position  | Ref | Var | Gene     | cDNA     | aa       | Allele Fraction | Fold Coverage |
|-------|-----------|-----|-----|----------|----------|----------|-----------------|---------------|
| 1     | 9165579   | G   | A   | GPR157   | c.C758T  | p.P253L  | 58.8%           | 51            |
| 2     | 179368547 | A   | G   | PLEKHA3  | c.A836G  | p.E279G  | 45.5%           | 77            |
| 3     | 186300546 | C   | T   | DNAJB11  | c.C724T  | p.R242X  | 39.0%           | 41            |
| 4     | 57325538  | G   | A   | PAICS    | c.G1114A | p.G371D  | 36.5%           | 52            |
| 4     | 130003466 | C   | A   | SCLT1    | c.G97T   | p.V33L   | 58.1%           | 31            |
| 4     | 184240817 | A   | G   | CLDN22   | c.T555C  | p.C185C  | 36.2%           | 58            |
| 4     | 184240822 | G   | T   | CLDN22   | c.C550A  | p.H184N  | 32.1%           | 56            |
| 5     | 79854550  | C   | T   | ANKRD34B | c.G1289A | p.R430Q  | 57.3%           | 82            |
| 8     | 29996212  | G   | A   | MBOAT4   | c.C180T  | p.A60A   | 30.6%           | 36            |
| 8     | 144732816 | G   | A   | ZNF623   | c.G654A  | p.T218T  | 37.3%           | 158           |
| 8     | 145113797 | G   | A   | OPLAH    | c.C466T  | p.R156C  | 32.5%           | 114           |
| 10    | 77158714  | C   | A   | ZNF503   | c.G1734T | p.S578S  | 33.1%           | 133           |
| 10    | 114044382 | G   | A   | TECTB    | c.G166A  | p.G56R   | 35.6%           | 90            |
| 14    | 105167919 | G   | T   | INF2     | c.G217T  | p.G73C   | 35.9%           | 53            |
| 17    | 40688647  | G   | A   | NAGLU    | c.G357A  | p.G119G  | 67.7%           | 31            |
| 18    | 46343709  | C   | T   | CTIF     | c.C1495T | p.R499C  | 32.8%           | 67            |
| 19    | 12786940  | T   | G   | DHPS     | c.A905C  | p.Y302S  | 39.8%           | 88            |
| 19    | 55341682  | G   | A   | KIR3DL1  | c.G1287A | p.T429T  | 53.3%           | 137           |
| 19    | 55450893  | G   | A   | NLRP7    | c.C1294T | p.R432X  | 59.6%           | 52            |
| 20    | 44472914  | G   | A   | ACOT8    | c.C634T  | p.R212W  | 40.3%           | 62            |
| 21    | 47842033  | G   | A   | PCNT     | c.G7174A | p.V2392M | 50.0%           | 54            |

MOLM-13 SETD2 clone 1 6-TG treated subclone 3

| Chrom | Position  | Ref | Var | Gene    | cDNA      | aa       | Allele Fraction | Fold Coverage |
|-------|-----------|-----|-----|---------|-----------|----------|-----------------|---------------|
| 1     | 33318687  | G   | A   | S100PBP | c.G1032A  | p.S344S  | 62.1%           | 29            |
| 1     | 215848914 | C   | T   | USH2A   | c.G12339A | p.L4113L | 35.7%           | 98            |
| 1     | 225605797 | A   | C   | LBR     | c.T726G   | p.N242K  | 31.8%           | 66            |
| 1     | 228482059 | G   | A   | OBSCN   | c.G12625A | p.G4209R | 30.9%           | 222           |
| 2     | 179664242 | C   | T   | TTN     | c.G886A   | p.V296M  | 45.7%           | 35            |
| 4     | 80828600  | G   | A   | ANTXR2  | c.C1450T  | p.R484X  | 47.0%           | 66            |
| 6     | 8097577   | C   | A   | EEF1E1  | c.G211T   | p.V71F   | 32.0%           | 194           |
| 7     | 45632413  | G   | C   | ADCY1   | c.G695C   | p.R232P  | 43.3%           | 134           |

|    |           |   |   |         |           |          |       |     |
|----|-----------|---|---|---------|-----------|----------|-------|-----|
| 7  | 129856219 | G | A | C7orf45 | c.G644A   | p.R215Q  | 55.4% | 74  |
| 8  | 1497006   | C | - | DLGAP2  | c.147delC | p.P49fs  | 43.8% | 73  |
| 8  | 97614665  | G | T | SDC2    | c.G215T   | p.R72L   | 33.3% | 84  |
| 9  | 27949928  | C | T | LINGO2  | c.G742A   | p.G248S  | 50.0% | 80  |
| 9  | 96002095  | G | T | WNK2    | c.G1379T  | p.R460M  | 53.7% | 41  |
| 11 | 18566292  | C | T | UEVLD   | c.G824A   | p.R275Q  | 54.8% | 42  |
| 11 | 124750467 | G | A | ROBO3   | c.G4112A  | p.R1371Q | 43.6% | 39  |
| 13 | 103386377 | G | A | CCDC168 | c.C16670T | p.P5557L | 36.3% | 190 |
| 13 | 110437001 | G | A | IRS2    | c.C1400T  | p.P467L  | 31.6% | 19  |
| 13 | 114265317 | C | G | TFDP1   | c.C19G    | p.L7V    | 34.6% | 52  |
| 15 | 41247882  | G | A | CHAC1   | c.G570A   | p.A190A  | 56.3% | 80  |
| 16 | 837081    | C | T | RPUSD1  | c.G405A   | p.S135S  | 57.1% | 77  |
| 19 | 39056105  | C | G | RYR1    | c.C13131G | p.T4377T | 45.5% | 22  |

MOLM-13 SETD2 clone 1 6-TG treated subclone 4

| Chrom | Position  | Ref | Var | Gene      | cDNA      | aa       | Allele Fraction | Fold Coverage |
|-------|-----------|-----|-----|-----------|-----------|----------|-----------------|---------------|
| 1     | 9416635   | G   | C   | SPSB1     | c.G685C   | p.G229R  | 58.2%           | 67            |
| 1     | 109792706 | G   | A   | CELSR2    | c.G5A     | p.R2Q    | 52.8%           | 36            |
| 1     | 112269921 | C   | T   | FAM212B   | c.G563A   | p.R188H  | 50.0%           | 144           |
| 1     | 151065741 | G   | A   | GABPB2    | c.G350A   | p.R117Q  | 27.6%           | 58            |
| 1     | 155429656 | C   | T   | ASH1L     | c.G5018A  | p.R1673Q | 37.8%           | 74            |
| 1     | 226574110 | C   | T   | PARP1     | c.G751A   | p.E251K  | 30.2%           | 63            |
| 1     | 228475649 | C   | T   | OBSCN     | c.C11086T | p.L3696F | 38.9%           | 185           |
| 2     | 144903256 | C   | T   | GTDC1     | c.G230A   | p.R77Q   | 62.5%           | 64            |
| 2     | 220348881 | C   | A   | SPEG      | c.C6696A  | p.P2232P | 52.8%           | 127           |
| 3     | 52840153  | T   | C   | ITIH3     | c.T1943C  | p.Y647Y  | 44.6%           | 56            |
| 4     | 83838545  | G   | A   | THAP9     | c.G1180A  | p.D394N  | 45.5%           | 132           |
| 4     | 154243913 | C   | T   | TRIM2     | c.C1896T  | p.N632N  | 53.2%           | 47            |
| 4     | 155412111 | G   | A   | DCHS2     | c.C397T   | p.R133C  | 44.8%           | 58            |
| 4     | 186573876 | C   | T   | SORBS2    | c.G31A    | p.D11N   | 33.9%           | 59            |
| 5     | 169230141 | G   | A   | DOCK2     | c.G2634A  | p.Q878Q  | 38.5%           | 26            |
| 6     | 13597247  | C   | G   | SIRT5     | c.C294G   | p.R98G   | 37.3%           | 102           |
| 6     | 26252176  | C   | T   | HIST1H2BF | c.C298T   | p.R100C  | 34.5%           | 113           |
| 6     | 30037001  | G   | A   | PPP1R11   | c.G299A   | p.R100H  | 25.3%           | 91            |
| 6     | 34100794  | C   | T   | GRM4      | c.G480A   | p.S160S  | 35.2%           | 165           |
| 6     | 99848490  | G   | A   | PNISR     | c.C2344T  | p.R782X  | 35.2%           | 182           |
| 6     | 147047289 | T   | C   | ADGB      | c.T2308C  | p.F770L  | 38.8%           | 134           |
| 7     | 45120355  | C   | T   | NACAD     | c.G4558A  | p.E1520K | 56.8%           | 88            |
| 8     | 145012372 | G   | A   | PLEC      | c.C115T   | p.R39C   | 34.7%           | 72            |
| 9     | 34996776  | C   | T   | DNAJB5    | c.C942T   | p.I314I  | 49.4%           | 85            |
| 9     | 35740951  | G   | A   | GBA2      | c.C897T   | p.D299D  | 48.9%           | 137           |
| 9     | 93606245  | G   | A   | SYK       | c.G65A    | p.R22Q   | 47.6%           | 63            |
| 9     | 96054847  | G   | A   | WNK2      | c.G5100A  | p.S1700S | 46.5%           | 101           |
| 10    | 88415952  | C   | T   | OPN4      | c.C185T   | p.T62M   | 38.1%           | 84            |
| 10    | 133787409 | C   | T   | BNIP3     | c.G85A    | p.G29R   | 47.4%           | 38            |
| 12    | 52713145  | G   | A   | KRT83     | c.C388T   | p.R130C  | 53.1%           | 32            |
| 12    | 113629398 | C   | T   | C12orf52  | c.C586T   | p.R196W  | 34.7%           | 193           |
| 12    | 133294343 | G   | A   | PGAM5     | c.G544A   | p.E182K  | 28.4%           | 87            |
| 13    | 28498641  | G   | T   | PDX1      | c.G655T   | p.G219W  | 39.5%           | 43            |
| 13    | 28542991  | C   | T   | CDX2      | c.G153A   | p.A51A   | 27.5%           | 91            |

|    |           |   |   |         |          |          |        |     |
|----|-----------|---|---|---------|----------|----------|--------|-----|
| 14 | 50734598  | C | T | L2HGDH  | c.G937A  | p.V313I  | 49.4%  | 77  |
| 14 | 102973937 | C | T | ANKRD9  | c.G290A  | p.R97Q   | 50.0%  | 28  |
| 15 | 65621374  | G | A | IGDCC3  | c.C2318T | p.T773M  | 50.0%  | 48  |
| 15 | 66015267  | C | T | DENND4A | c.G1507A | p.V503I  | 47.4%  | 19  |
| 15 | 101569375 | G | A | LRRK1   | c.G2901A | p.T967T  | 37.1%  | 97  |
| 16 | 15122739  | G | A | PDXDC1  | c.G1209A | p.P403P  | 38.9%  | 18  |
| 16 | 25238440  | G | A | AQP8    | c.G654A  | p.A218A  | 48.5%  | 66  |
| 16 | 71571025  | C | T | CHST4   | c.C445T  | p.R149W  | 49.8%  | 197 |
| 16 | 75148128  | C | T | LDHD    | c.G634A  | p.G212S  | 38.5%  | 78  |
| 16 | 84353089  | G | A | WFDC1   | c.G474A  | p.S158S  | 41.8%  | 55  |
| 17 | 10543394  | C | T | MYH3    | c.G2601A | p.S867S  | 50.0%  | 84  |
| 17 | 35299591  | G | A | LHX1    | c.G770A  | p.R257Q  | 43.3%  | 30  |
| 17 | 37762108  | C | T | NEUROD2 | c.G745A  | p.A249T  | 57.0%  | 100 |
| 19 | 1986631   | G | A | BTBD2   | c.C1434T | p.Y478Y  | 44.9%  | 78  |
| 19 | 3526383   | C | T | FZR1    | c.C388T  | p.T129M  | 33.3%  | 72  |
| 19 | 3833724   | G | A | ZFR2    | c.C317T  | p.P106L  | 33.7%  | 95  |
| 19 | 12902612  | C | A | JUNB    | c.C27A   | p.F9L    | 25.5%  | 157 |
| 19 | 18054501  | G | A | CCDC124 | c.G649A  | p.V217M  | 33.3%  | 117 |
| 19 | 44351826  | G | A | ZNF283  | c.G1073A | p.R358H  | 54.6%  | 77  |
| 20 | 55026995  | G | A | CASS4   | c.G601A  | p.V201I  | 50.7%  | 73  |
| 21 | 38480702  | G | A | TTC3    | c.G856A  | p.G286S  | 47.1%  | 17  |
| 21 | 42551516  | G | T | PLAC4   | c.C40A   | p.L14I   | 31.6%  | 19  |
| 23 | 15373324  | G | A | FIGF    | c.C589T  | p.R197C  | 100.0% | 40  |
| 23 | 152845617 | C | T | ATP2B3  | c.C3524T | p.P1175L | 97.9%  | 47  |
